# Supplementary material for: Multimodal chromatin profiling using nanobody-based single-cell CUT&Tag
Source: PubMed Central journal article supplement (PMC10264246; doi:10.1038/s41587-022-01535-4), 2022-12-19
Supplement: 41587_2022_1535_MOESM1_ESM.pdf [file 41587_2022_1535_MOESM1_ESM.pdf]

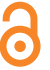

---

# Multimodal chromatin profiling using nanobody-based single-cell CUT&Tag

---

In the format provided by the authors and unedited

---

## Supplementary sequence 1. Anti-mouse nanobody-Tn5 fusion protein sequence

>anti-Mouse-Tn5\_protein\_sequence

MHHHHHS SGVDLGT ENLYFQ SG DYKDHDGDYKDHDIDYKDDDDK GGGG QVQLVESGGGWVQPGGSLR  
LSCAASGFTFSDTAMMWVRQAPGKGREWVAIDTGGGYTYYADSVKGRFTISRDNAKNTLYLQMNSLK  
PEDTARYYCAKTYSGNYYSNYTVANYGTTGRGTLVTVSS GGGGSGGGGSGGGGSGGGGSHMITSALHR  
AADWAKSVFSSAALGDPRTARLVNVAQLAKYSGKSITISSEGSKAMQEGAYRFIRNPVSAEAIK  
AGAMQTVKLAQEFPELLAIEDTTSLSYRHQVAEELGKLSIQDKSRGWVHVSVLLLEATTFRTVGLLH  
QEWWMRPDDPADADEKESGKWLAAAATSRLRMGSMMSNVIAVCDREADIHAYLQDKLAHNERFVVRSK  
HPRKDVESGLYLYDHLKNQPELGGYQISIPQKGVVDKRGKRKNRPARKASLSLRSGRITLKQGNITLN  
AVLAEIINPPKGETPLKWLTLTSEPVESLAQALRVIDIYTHRWRIEFHKAWKTGAGAERQRMEEPDN  
LERMVSILSFVAVRLLQLRESFTPPQALRAQGLLKEAEHVESQSAETVLTLPDECQLLGYLDKGRKRYK  
EKAGSLQWAYMAIARLGGFMDSKRTGIASWGALWEGWEALQSKLDGFLLAAKDLMAQGIKI

6x HIS tag

TEV cleavage site

3xFLAG tag

Anti-mouse nanobody

4x GGGGS linker

Tn5 transposase

>anti-Mouse-Tn5\_DNA\_Sequence

ATGCACCACCACCATCACCATAGTAGCGGAGTCGACTTGGGCACCGAGAATCTGTACTTTCAAAG  
TGGCGATTACAAGGACCACGACGGCGACTACAAGGACCATGACATCGACTATAAGGATGATGATG  
ACAAGGGCGGTGGTTCACAAGTCCAATTGGTTGAGAGTGGCGGTGGTTGGGTTCAACCGGGTGGT  
TCATTGCGTCTCAGTTGTGCCGCGAGCGGCTTTACATTTTCAGACACCGCCATGATGTGGGTACG  
TCAAGCTCCGGCAAGGGCGGTGAGTGGGTGGCTGCCATCGACACTGGTGGCGGCTATACTTACT  
ATGCGGACTCCGTCAAAGCCGTTTTACGATCTCCCGTGACAATGCGAAGAATACGTTATATCTC  
CAAATGAATTTCGCTCAAGCCTGAAGACACCGCGCTTATTATTGTGCGAAGACGTATTCAGGGAA  
TTACTACAGTAATTACACGGTTGCTAACTACGGGACGACCGGTCGTGGAACCTTGGTTACGTTTT  
CAAGCGGTGGTGGTGAAGTGGTGGTGGTGGTGGTGGTGGTGGTGGTGGTGGTGGTGGTGGTGGT  
CACATGATTACGTCAGCGTTGCACCGTGTGCGGACTGGGCGAAGAGCGTGTCTCAAGCGCAGC  
ACTTGGTGATCCTCGTCGTACGGCCCGCTGGTGAATGTTGCGGCCCAACTGGCCAAATACAGTG  
GTAAATCAATTACGATTAGTTCGGAAGGCAGCAAGGCAATGCAGGAAGGTGCATACCGCTTCATC  
CGTAATCCCAACGTTAGTGCAGGAAGCCATTCGCAAGGCAGGCGCGATGCAGACAGTGAAATTAGC  
ACAGGAATTTCCGGAATTACTTGCATTGAGGATAACAACGAGCTTATCGTATCGTCATCAAGTCG  
CGGAAGAACTGGGCAAATTAGGGTCAATCCAGGATAAAAAGCCGTGGTTGGTGGGTGCATTCAGTT  
CTGCTGCTGGAGGCGACCACTTTTCGCACGGTGGGCCTGTTACATCAAGAGTGGTGGATGCGCCC  
GGATGATCCCGCGGACGCGGATGAAAAGGAGAGCGGCAAATGGCTCGCGGCCGCGGCCACCTCCC  
GCCTGCGTATGGGCAGCATGATGTGCAACGTGATCGCCGTGTGCGATCGCGAAGCGGATATTCAC  
GCGTACCTGCAGGACAAACTGGCTCATAATGAACGGTTTGTGGTGCCTCTAAACATCCGCGTAA  
AGACGTTGAATCCGCTTATACTCTACGACCATCTGAAGAACCAACCAGAGCTTGGTGGGTACC  
AGATTTCTATTCCGCAGAAGGGTGTAGTGGATAAACGTGGTAAACGTAAAAATCGCCCAGCCCGT  
AAAGCGAGCTTGAGCTTGCCTTCGGTTCGATCACGTTAAACAAGGTAACATCACCCCTCAATGC  
AGTGCTGGCTGAGGAAATTAATCCACCGAAAGGTGAGACCCCGCTGAAATGGCTGCTGCTGACTA  
GCGAACCAGGTGGAATCCCTGGCGCAGGCGCTTCGTGTGATTGATATTTACACCCATCGTTGGCGT  
ATCGAGGAATTTACAAGCGGTGGAACAGGCGCAGGCGCCGAACGCCAGCGTATGGAAGAGCC  
AGATAACCTGGAGCGTATGGTATCGATCCTGTCGTTTCGTGGCTGTGCGTCTTCTGCAGCTGCGCG  
AGTCCTTCACTCCGCCGACGGCCTTACGGGCTCAGGGCCTTCTGAAGGAAGCCGAGCACGTTGAA  
TCGCAAAGCGCCGAAACGGTGTGACACCGGACGAGTGCCAGTTACTGGGTTATTTAGACAAGGG  
CAAGCGGAAACGCAAAGAAAAAGCCGGCTCCCTTCAGTGGGCCTATATGGCAATCGCACGTCTCG  
GCGGCTTTTATGGATTGCAAACGCACCGGCATTGCAAGCTGGGGCGCTCTGTGGGAGGGTTGGGAA  
GCGCTGCAGAGTAAGCTGGATGGTTTTTTTTGGCTGCTAAAGACTTGATGGCTCAGGGAATCAAAAT  
CTAA

## Supplementary sequence 2. Anti-mouse nanobody-Tn5 fusion protein sequence

>anti-Rabbit-Tn5\_protein\_sequence

MHHHHHSSGVDLGTENLYFQSGDYKDHDGDYKDHDIDYKDDDDKGGGSQVQLVESGGGLVQAGDSLRLSCVASGRSLDGATMRWYRQAPGKEREVAGIFWDEIGTEYADTAKGRFTISRDNKNTIYLQMTNLRSEDTAMYCNGLVFGGEYWGQGTQVTVSSGGGSGGGSGGGSGGGSGGGSHMITSALHRAADWAKSVFSSAALGDPRTARLVNVAQLAKYSGKSITISSEGSKAMQEGAYRFIRNPVSAEAIKAGAMQTVKLAQEFPELLAIEDTTSLSYRHQVAEELGKLGSIQDKSRGWVHVSVLLLEATTFRTVGLLHQEWWMRPDDPADADEKESGKWLAAAATSRLRMGSMSNVIAVCDREADIHAYLQDKLAHNERFVVRSKHPRKDVESGLYLYDHLKNQPELGGYQISIPQKGVVDKRGKRKNRPARKASLSLRSGRITLKQGNITLNAVLAEEINPPKGETPLKWLTTSEPVESLAQALRVIDIYTHRWRIEEFHKAWKTGAGAERQRMEEPDLNLERMVSILSFVAVRLLQLRESFTPPQALRAQGLLKEAEHVESQSAETVLTTPDECQLLGYLDKGRKRKEKAGSLQWAYMAIARLGGFMSKRTGIASWGALWEGWEALQSKLDGFLAAKDLMAQGIKI

6x HIS tag

TEV cleavage site

3xFLAG tag

Anti-rabbit nanobody

4x GGGGS linker

Tn5 transposase

>anti-Rabbit-Tn5\_DNA\_Sequence

ATGCATCACCACCACCACCATTTCTTCTGGCGTCGACTTGGGTACGGAGAATCTGTATTTTCAATC  
GGGAGACTACAAGGACCACGATGGTGACTATAAGGATCACGATATCGACTATAAAGACGACGACG  
ACAAGGGTGGCGGTTCCCAAGTACAATTGGTTCGAGTCAGGCGGTGGTCTTGTACAAGCAGGTGAC  
AGCTTACGCCTGAGTTGTGTTGCGAGTGGACGCAGCCTTACGCGAGCCACGATGCGCTGGTACCG  
CCAAGCGCCTGGGAAGGAGCGTGAGTTTGTGGCGGGTATCTTCTGGGACGAGATTGGCACTGAGT  
ACGCGGACACCGCCAAGGGTCGCTTTACGATTTCTCGCGACAATGCCAAGAACACCATTTATTTG  
CAAATGACAAATCTGCGCTCTGAGGACACTGCTATGTATTATTGTAATGGACTCGTATTTGGCGG  
AGAGTATTGGGGCCAGGGCACCCAAGTAACTGTGAGCTCTGGCGGCGGTGGCTCAGGTGGTGGTG  
GTTCCGGTGGCGGCGGTTCTGGTGGTGGTGAAGTCACATGATCACGCTCGCCCTGCATCGTGCC  
GCGGACTGGGCCAAGAGCGTCTTCAGCTCCGCTGCGTTGGGCGATCCCCGCCGTACGGCGCGCCT  
GGTGAACGTTGCCGCACAGCTTGCGAATATAGCGGTAAAAGTATCACGATCAGCAGTGAGGGTA  
GCAAAGCCATGCAAGAGGGTGCATCGTTTCATCCGCAATCCGAATGTATCGGCTGAAGCAATT  
CGTAAAGCCGGGGCTATGCAGACCGTGAAACTTGCCCAAGAATTTCTGAACTCCTGGCAATCGA  
AGATACCACCTCCCTGTGCTACCGGCATCAGGTTGCGGAAGAAGTGGGAAACTGGGCAGTATCC  
AGGACAAATCACGGGGATGGTGGGTCCACTCTGTTCTGTTACTTGAAGCAACAACCTTTCGCACG  
GTGGGCCTTCTCCATCAGGAATGGTGGATGCGCCAGATGACCCCGCCGATGCGGATGAAAAAGA  
AAGCGGGAAGTGGCTTGTGTCGGCCGCAACGTCGCGGTTACGTATGGGCAGCATGATGAGCAACG  
TGATTGCAGTGTGCGATCGTGAAGCCGACATTCACGCTTATTTGCAGGACAAATTAGCGCACAAT  
GAACGCTTTCGTAGTCCGTTTCGAAACATCCGCGTAAAGACGTTGAATCTGGCCTGTACCTGTATGA  
TCACCTGAAAAACCAGCCGAGCTGGGCGGTTATCAGATCAGCATTCCGCAGAAAGGAGTGGTTG  
ATAAGCGCGCAAACGCAAAAACCGTCCGCGCGTAAAGCTAGCCTTAGCTTACGTTCTGGGCGC  
ATCACGCTTAAACAGGGTAACATTACGCTCAATGCAGTCTTAGCAGAAGAAATCAACCCTCCGAA  
AGGTGAAACGCCACTGAAATGGCTGCTGCTCACCAGCGAACCAGTGGAGAGTTTGGCACAAGCTC  
TGCGCGTAATTGATATCTACTCATCGCTGGCGGATTGAAGAATTTACAAAGCGTGAAAACC  
GGTGCCGGCGCAGAACGTCAGCGTATGGAGGAACCGGATAATCTGGAGCGCATGGTGTCTATTCT  
GTCATTCGTTGCGGTTTCGCTTGTGTCAGCTGCGCAATCGTTTACGCCTCCGCAGGCGCTCCGTG  
CACAGGTCTGTTAAAAGAGGCGGAACATGTGGAAAGTCAGTCGGCTGAGACTGTGCTGACGCCA  
GACGAATGTCAGTTGTTGGGGTATCTGGATAAAGGCAAACGCAAACGGAAAGAGAAAGCCGGCTC  
CCTCCAATGGGCGTACATGGCAATCGCACGCTTGGGCGGCTTCATGGATAGCAAACGTACCGGTA  
TTGCTAGCTGGGGTGCCCTGTGGGAAGGATGGGAAGCCCTGCAGTCGAAACTGGATGGCTTCTCTG  
GCCGCGAAAGATCTGATGGCGCAAGGTATCAAGATTTGA

## Supplementary figure 1

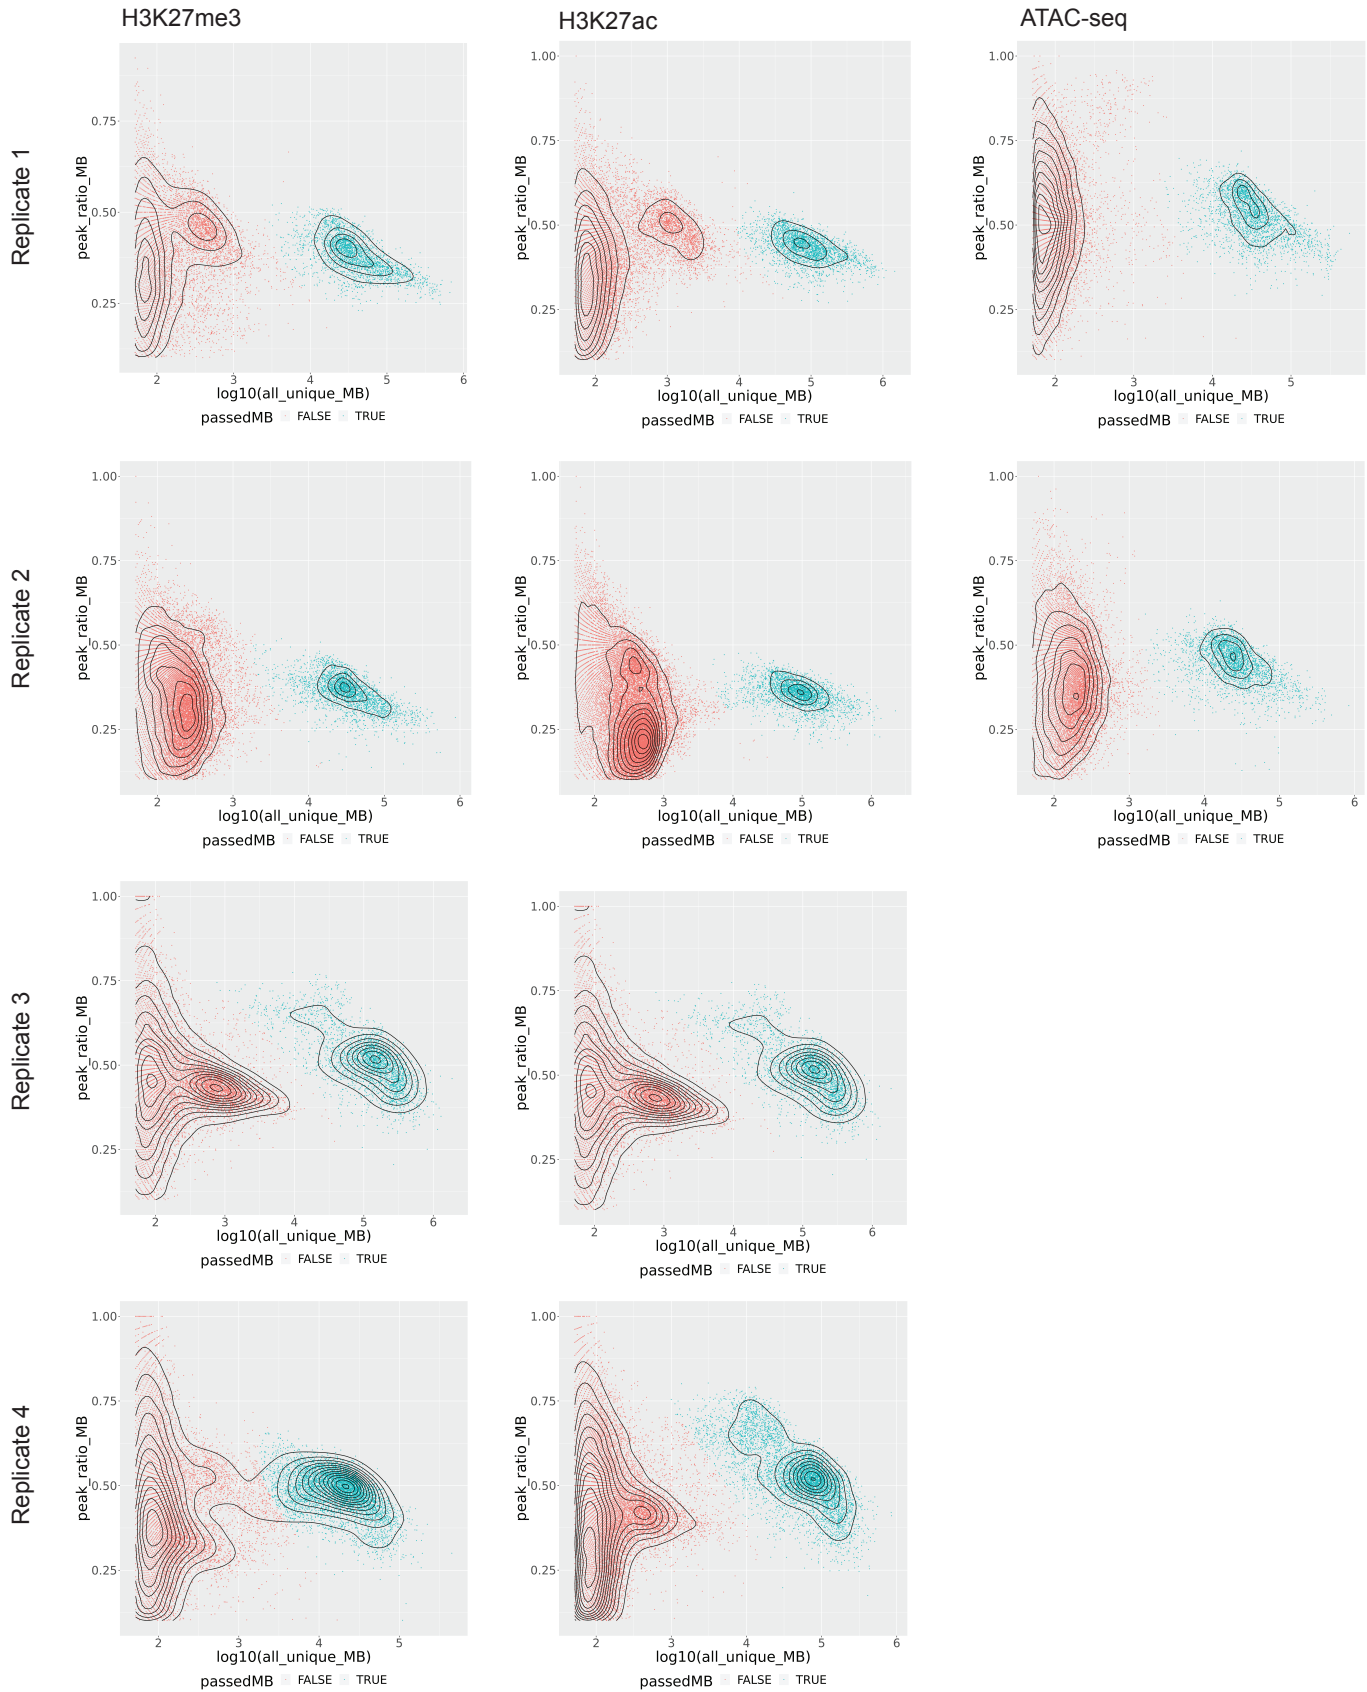

**Supplementary data figure 1. a.** Scatter plot showing number of reads per cell (x-axis) versus fraction of reads in peak regions (y-axis). Gaussian mixed model clustering was used to identify clusters of cells and cluster with the highest median of number of reads was selected as valid cells. Valid cells are labeled with cyan, while cells that do not pass QC are red. Contour lines depict density of points within regions.



# Supplementary figure 2

a

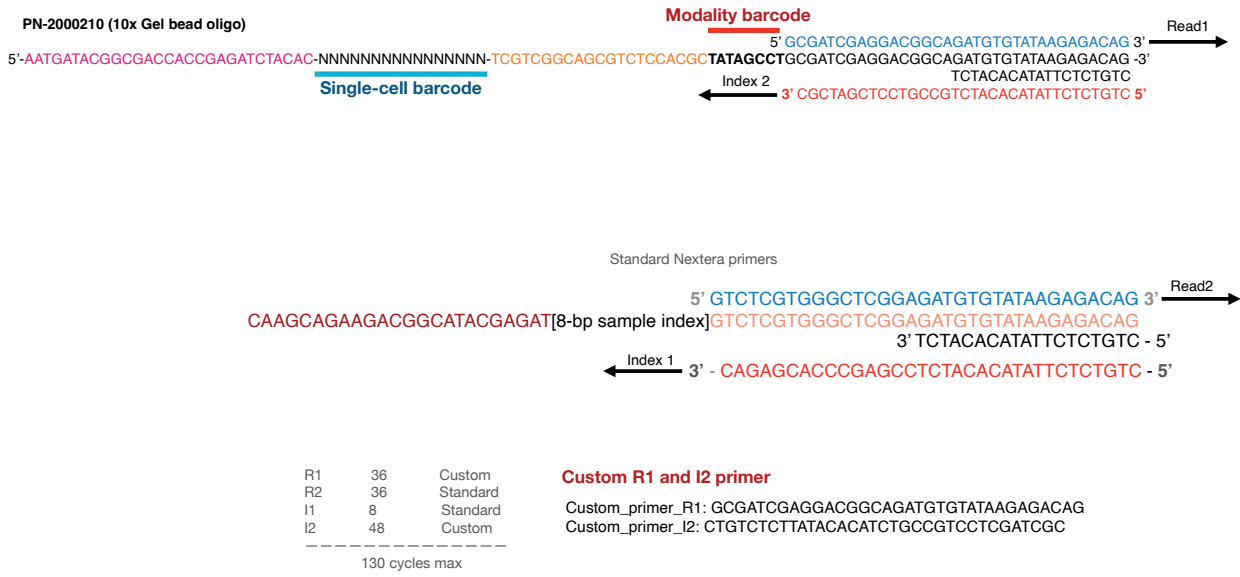

## Supplementary data figure 2

a. Structure of the nano-CT library with highlighted barcode regions.
